# Supplementary material for: Effectiveness of a Simulation-based Point-of-care Ultrasound Course for Prehospital Providers - A Single Group Quasi-Experimental Study
Source: Research Square preprint supplement (doi:10.21203/rs.3.rs-5831070/v1), 2025-03-31
Supplement: Supplementary file 1 [file 8da51aa8bb07aae8ccf92e1a.pdf]

## Intro & Demographics

### Training Evaluation Questionnaire EMS Point of Care Ultrasound Course

Please take 3-4 minutes to fill out this questionnaire. Your input will greatly help to continuously improve the quality of this training program.

Responses are confidential and no personal identifiers are collected. However, data may be used in the aggregate for reports or publications.

We appreciate your time and feedback on your training with the Gordon Center.

Your current job role? (Please select one or multiple)

How many years of experience do you have in your current job role?

- ☐ Less than 1
- ☐ 1-3
- ☐ 4-6
- ☐ 7-9
- ☐ 10 or more

Primary job function

- ☐ Clinician (prehospital or hospital)
- ☐ Education
- ☐ Administration
- ☐ Research
- ☐  Other

Highest level of education:

- ☐ AS/AA
- ☐ BS/BA
- ☐ Doctorate (MD/PhD)
- ☐ EMT-P
- ☐ Masters
- ☐  Other

What is your current training year?

## Training Evaluation

Please reflect on the training and provide your responses below.

### Content:

(Mark your response using the scale: **Strongly disagree** to **Strongly agree**)

|                                                                                                   | Strongly<br>Disagree (1) | Disagree (2)          | Neither Agree<br>nor Disagree<br>(3) | Agree (4)             | Strongly<br>Agree (5) |
|---------------------------------------------------------------------------------------------------|--------------------------|-----------------------|--------------------------------------|-----------------------|-----------------------|
| The program met the stated educational objectives.                                                | <input type="radio"/>    | <input type="radio"/> | <input type="radio"/>                | <input type="radio"/> | <input type="radio"/> |
| The content was appropriate for my level of education and training.                               | <input type="radio"/>    | <input type="radio"/> | <input type="radio"/>                | <input type="radio"/> | <input type="radio"/> |
| The concepts that I learned from this training are applicable to my work, job role or profession. | <input type="radio"/>    | <input type="radio"/> | <input type="radio"/>                | <input type="radio"/> | <input type="radio"/> |
| I have gained knowledge/skills that will improve patient care.                                    | <input type="radio"/>    | <input type="radio"/> | <input type="radio"/>                | <input type="radio"/> | <input type="radio"/> |

Do you agree that this training program was objective, balanced, and free from commercial bias or influence?

- ☐ No
- ☐ Yes

**Why do you think that this training program was not objective, balanced, and free from commercial bias or influence?**

## Setting

## Setting

(Mark your response using the scale: **Strongly disagree** to **Strongly agree**)

|                                                                   | Strongly disagree (1) | Somewhat disagree (2) | Neither agree nor disagree (3) | Somewhat agree (4)    | Strongly agree (5)    |
|-------------------------------------------------------------------|-----------------------|-----------------------|--------------------------------|-----------------------|-----------------------|
| A positive learning environment was maintained during the course. | <input type="radio"/> | <input type="radio"/> | <input type="radio"/>          | <input type="radio"/> | <input type="radio"/> |
| There was adequate time for hands-on skills practice.             | <input type="radio"/> | <input type="radio"/> | <input type="radio"/>          | <input type="radio"/> | <input type="radio"/> |
| The training facilities were conducive to learning.               | <input type="radio"/> | <input type="radio"/> | <input type="radio"/>          | <input type="radio"/> | <input type="radio"/> |

## INSTRUCTIONAL METHODS:

(Mark your response using the scale: **Strongly disagree** to **Strongly agree**)

|                                                            | Strongly disagree (1) | Somewhat disagree (2) | Neither agree nor disagree (3) | Somewhat agree (4)    | Strongly agree (5)    |
|------------------------------------------------------------|-----------------------|-----------------------|--------------------------------|-----------------------|-----------------------|
| The instructional materials were well-organized and clear. | <input type="radio"/> | <input type="radio"/> | <input type="radio"/>          | <input type="radio"/> | <input type="radio"/> |
| The length and pace of this course was appropriate.        | <input type="radio"/> | <input type="radio"/> | <input type="radio"/>          | <input type="radio"/> | <input type="radio"/> |

Strongly  
disagree (1)

Somewhat  
disagree (2)

Neither agree  
nor disagree  
(3)

Somewhat  
agree (4)

Strongly  
agree (5)

The course provided an  
adequate mixture of  
didactics and skills  
practice.

☐☐☐☐☐

**Any other feedback or suggestion on this training:**
